# Supplementary material for: Hydroxypropyl-β-cyclodextrin as an effective carrier of curcumin – piperine nutraceutical system with improved enzyme inhibition properties
Source: PubMed Central journal article supplement (PMC7534320; doi:10.1080/14756366.2020.1801670), 2020-09-23
Supplement: IENZ_A_1801670_SM5659.pdf [file IENZ_A_1801670_SM5659.pdf]

## Supplementary Materials

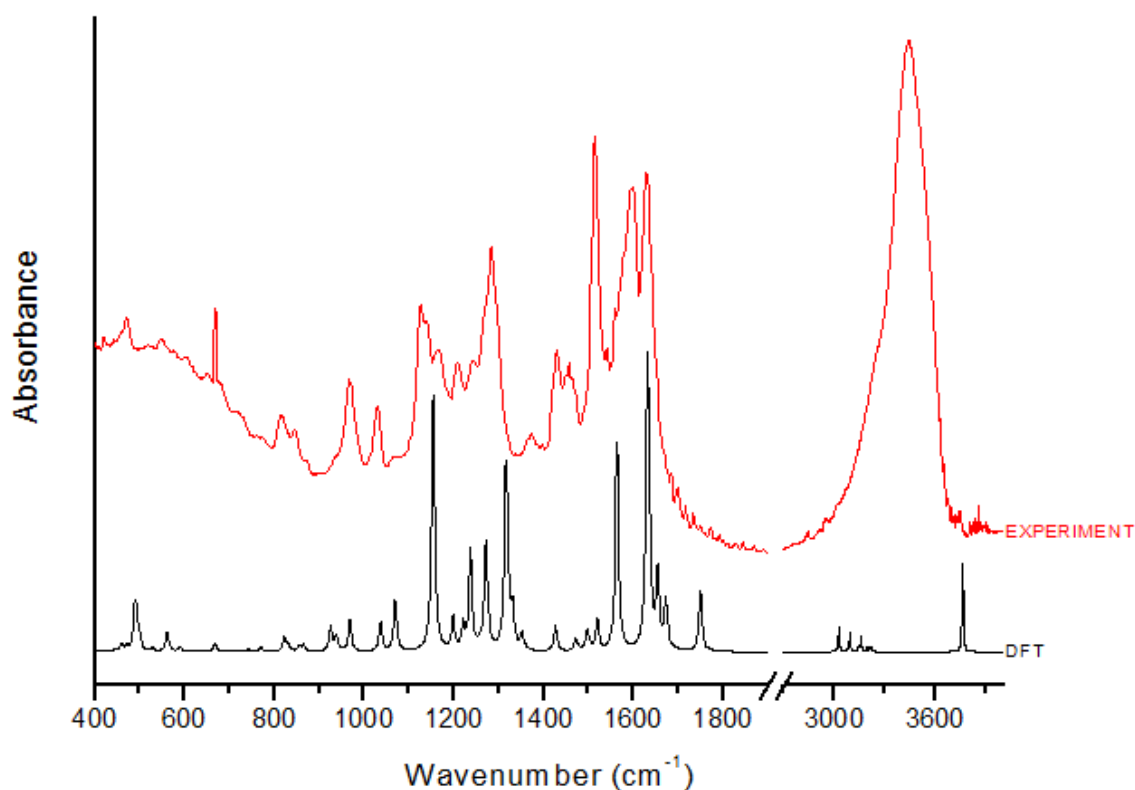

Figure S1. Calculation (black-DFT) and experimental (red) IR absorption spectra of curcumin at room temperature

Table S1. Selected characteristic vibronic features of curcumin theory with application of 6-31G(d,p) basis and experiment bands of curcumin. s-stretching, b-bending, w-wagging, r-rocking, t-twisting, oop-outside of the plane, def. - deformation.

| Calculation (cm <sup>-1</sup> ) | Experimental (cm <sup>-1</sup> ) | Band assignment                                |
|---------------------------------|----------------------------------|------------------------------------------------|
| 561                             | 470                              | Def. all molecule                              |
| 582                             | 548                              | Def. all molecule                              |
| 823                             | 815                              | Def. benzene rings                             |
| 855                             | 846                              | C-H w                                          |
| 865                             | 872                              | C-H w                                          |
| 968                             | 967                              | Def. all molecule                              |
| 1038                            | 1030                             | C-H w                                          |
| 1069                            | 1064                             | CH <sub>2</sub> t + C-O s + def. benzene rings |
| 1154                            | 1126                             | C-C s                                          |
| 1198                            | 1166                             | C-H w                                          |
| 1238                            | 1208                             | C-O-H b + C-H r                                |
| 1270                            | 1243                             | C-O s + C-O-H b + C-H r + CH <sub>2</sub> t    |
| 1320                            | 1283                             | C-O s + C-H r                                  |

|      |      |                                  |
|------|------|----------------------------------|
| 1426 | 1373 | C-O-H b + C-C s in benzene rings |
| 1470 | 1429 | C-H r                            |
| 1502 | 1457 | C-H w in CH <sub>3</sub>         |
| 1519 | 1465 | C-H r in CH <sub>3</sub>         |
| 1564 | 1514 | C-O s + C-C s                    |
| 1635 | 1560 | C-C s + C-O-H b + C-H r          |
| 1655 | 1577 | C=C s + C-C s + C-O-H b          |
| 1674 | 1597 | C=C s                            |
| 1749 | 1628 | C=O s + C=C s                    |
| 3025 | 2841 | C-H s in CH <sub>3</sub>         |
| 3156 | 2941 | C-H s                            |
| 3760 | 3440 | O-H s                            |

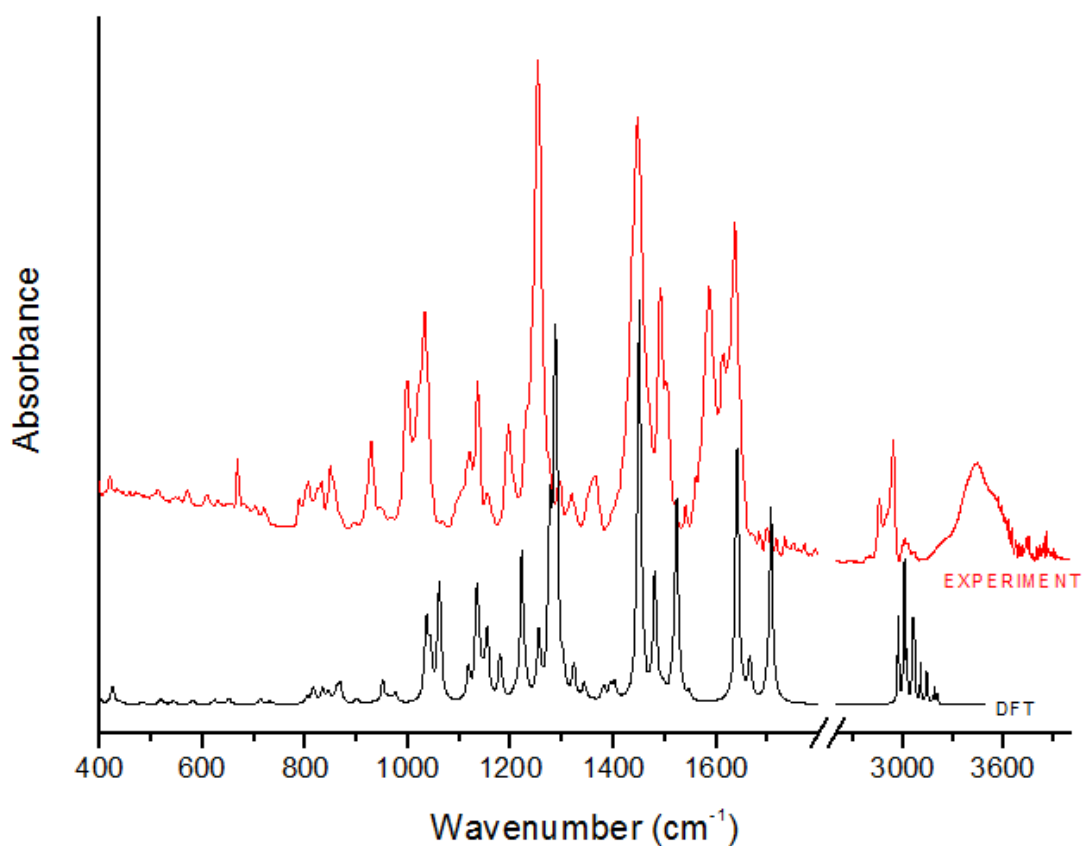

Fig. S2. Calculation (black-DFT) and experimental (red) IR absorption spectra of piperine at room temperature.

Table S2. Selected characteristic vibronic features of piperine theory with application of 6-31G(d,p) basis and experiment bands of piperine. s-stretching, b-bending, w-wagging, r-rocking, t-twisting, oop-outside of the plane, def. - deformation.

| Calculation (cm <sup>-1</sup> ) | Experimental (cm <sup>-1</sup> ) | Band assignment                     |
|---------------------------------|----------------------------------|-------------------------------------|
| 817                             | 789                              | Def. piperidine ring                |
| 833                             | 805                              | Breathing methyloendioxyphenyl ring |
| 844                             | 830                              | C-H w in piperidine ring            |

|      |      |                                                        |
|------|------|--------------------------------------------------------|
| 867  | 849  | C-H w in methyloendioxyphenyl ring                     |
| 950  | 928  | C-O s asym.                                            |
| 1035 | 999  | Def. piperidine ring                                   |
| 1061 | 1031 | C-O s                                                  |
| 1117 | 1099 | C-O s sym. + C-H r in methyloendioxyphenyl ring        |
| 1134 | 1118 | C-N s + C-H r                                          |
| 1154 | 1135 | C-N s + C-H <sub>2</sub> t in piperidine ring          |
| 1179 | 1154 | C-C s + C-H <sub>2</sub> t                             |
| 1221 | 1197 | C-H r                                                  |
| 1254 | 1230 | C-N s + C-H r                                          |
| 1286 | 1255 | C-C s in methyloendioxyphenyl ring + C-O s + C-H r     |
| 1323 | 1296 | C-H r                                                  |
| 1342 | 1320 | C-H r                                                  |
| 1394 | 1363 | C-C s in methyloendioxyphenyl ring                     |
| 1450 | 1448 | C-N s                                                  |
| 1480 | 1464 | C-C s in methyloendioxyphenyl ring + CH <sub>2</sub> t |
| 1522 | 1491 | C-O s + C-C s in methyloendioxyphenyl ring             |
| 1547 | 1540 | CH <sub>2</sub> t in methyloendioxyphenyl ring         |
| 1640 | 1584 | C=C s + C=O s                                          |
| 1666 | 1614 | C=C s                                                  |
| 1706 | 1636 | C=O s                                                  |
| 2973 | 2854 | C-H s in piperidine ring                               |
| 3104 | 2936 | C-H s in methyloendioxyphenyl ring                     |
| 3206 | 3016 | C-H s                                                  |

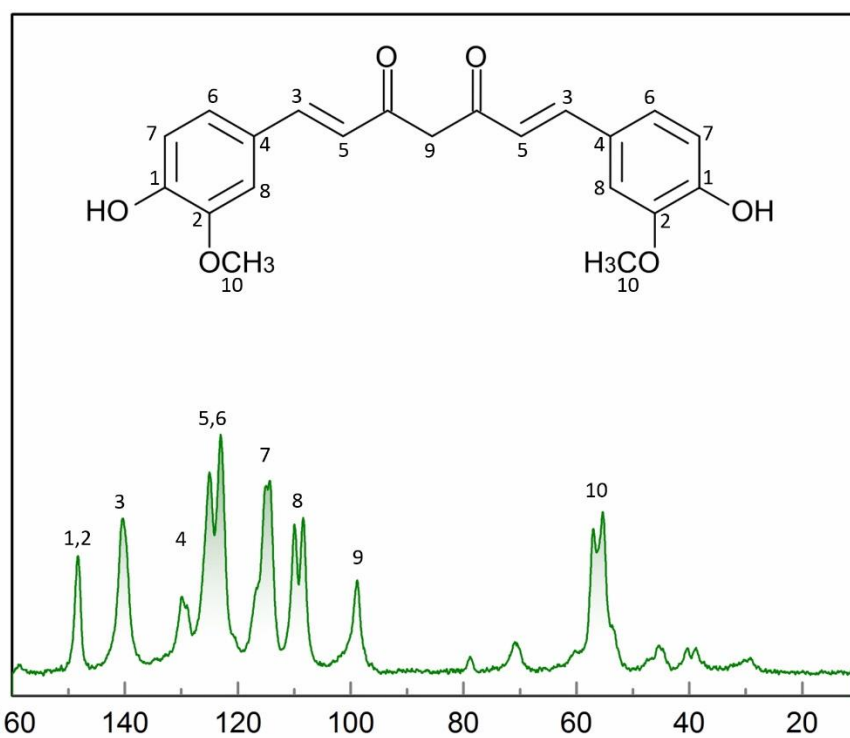

Fig. S3. <sup>13</sup>C NMR spectrum of curcumin.
